# Supplementary material for: The construction of self-supported thorny leaf-like nickel-cobalt bimetal phosphides as efficient bifunctional electrocatalysts for urea electrolysis
Source: Royal Society of Chemistry journal article supplement (doi:10.1039/c9ta00481e), 2019-01-01
Supplement: c9ta00481e1.pdf [file c9ta00481e1.pdf]

**Construction of self-supported leaf thorn-like nickel-cobalt bimetal phosphides  
as an efficient bifunctional electrocatalysts for urea electrolysis**

Linna Sha, Jinling Yin, Ke Ye\*, Gang Wang, Kai Zhu, Kui Cheng, Jun Yan, Guiling Wang, Dianxue Cao\*

Key Laboratory of Superlight Materials and Surface Technology of Ministry of Education, College of Materials Science and Chemical Engineering, Harbin Engineering University, Harbin, 150001, PR China

---

\*Corresponding authors.  
E-mail addresses: yeke@hrbeu.edu.cn (K. Ye); caodianxue@hrbeu.edu.cn (D. Cao)

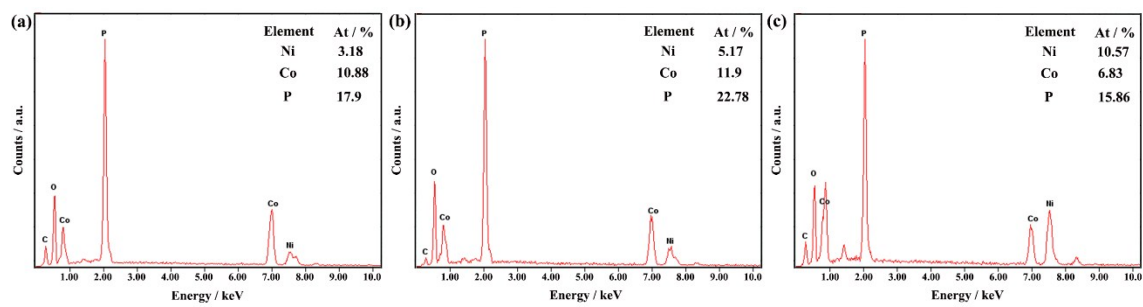

**Figure S1.** EDS spectra of (a)  $\text{Ni}_{0.22}\text{Co}_{0.78}\text{P}/\text{CC}$ , (b)  $\text{Ni}_{0.31}\text{Co}_{0.69}\text{P}/\text{CC}$  and (c)  $\text{Ni}_{0.61}\text{Co}_{0.39}\text{P}/\text{CC}$ .

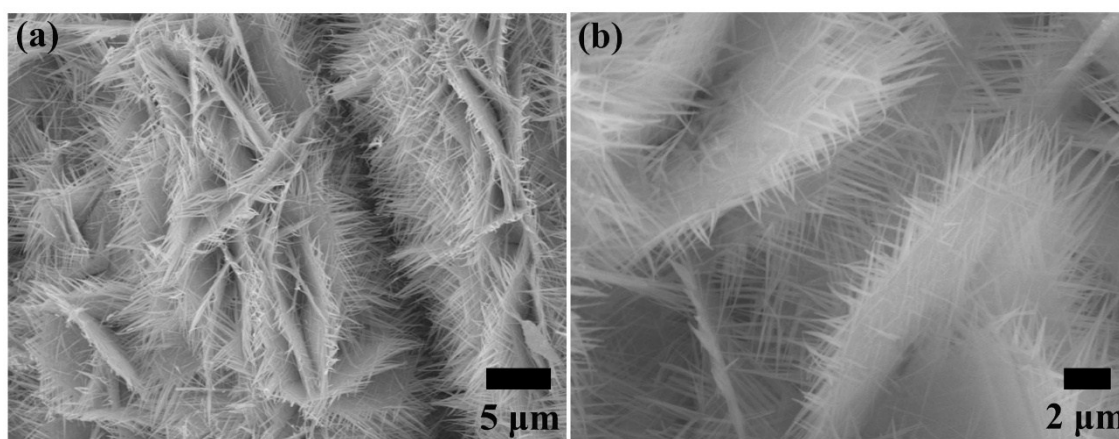

**Figure S2.** (a) Low-magnification and (b) high-magnification SEM images of the  $\text{NiCo-OH}/\text{CC}$  precursor.

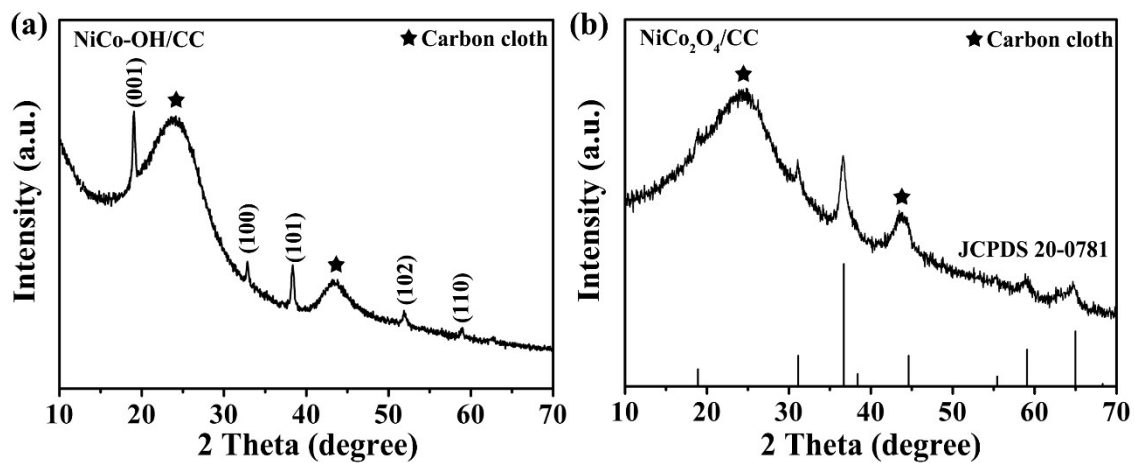

Figure S3. XRD patterns of the (a) NiCo-OH/CC precursor and (b) NiCo<sub>2</sub>O<sub>4</sub>/CC.

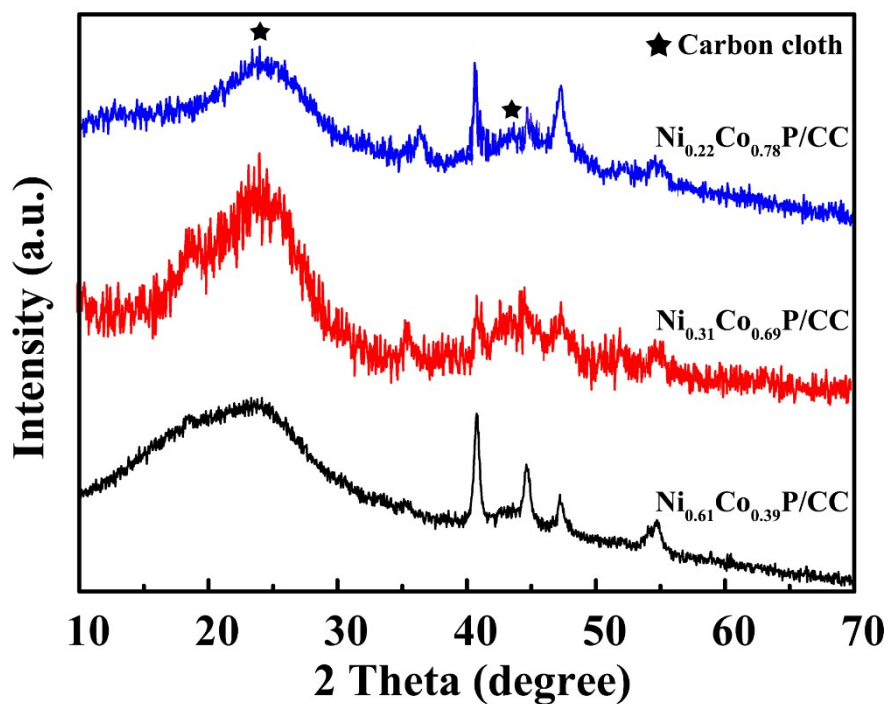

Figure S4. XRD patterns of the as-prepared Ni<sub>1-x</sub>Co<sub>x</sub>P/CC samples: Ni<sub>0.22</sub>Co<sub>0.78</sub>P/CC, Ni<sub>0.31</sub>Co<sub>0.69</sub>P/CC and Ni<sub>0.61</sub>Co<sub>0.39</sub>P/CC.

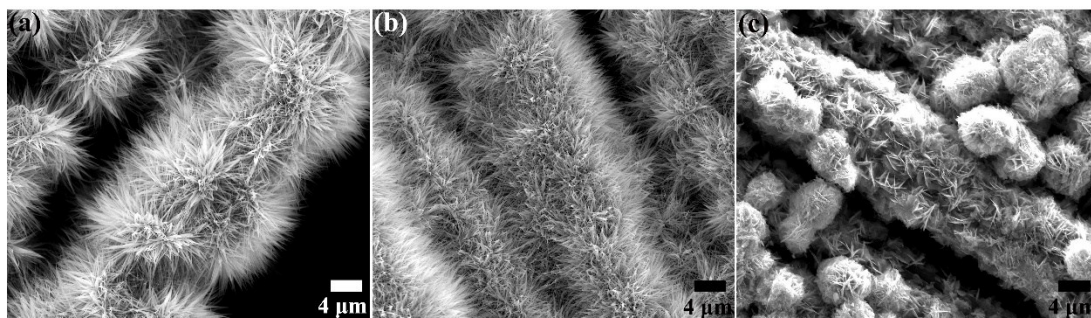

**Figure S5.** SEM images of (a)  $\text{Ni}_{0.22}\text{Co}_{0.78}\text{P}/\text{CC}$ , (b)  $\text{Ni}_{0.31}\text{Co}_{0.69}\text{P}/\text{CC}$  and (c)  $\text{Ni}_{0.61}\text{Co}_{0.39}\text{P}/\text{CC}$ .

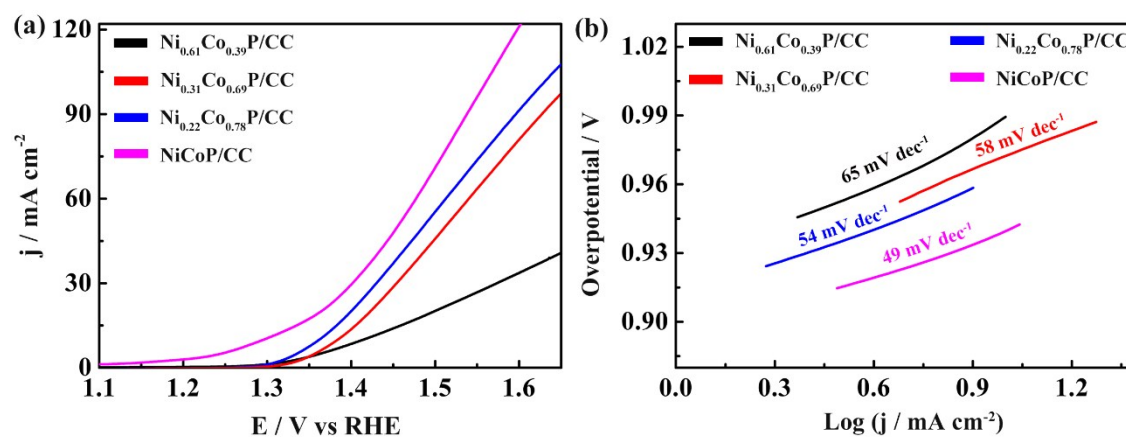

**Figure S6.** (a) LSV curves and (b) Tafel plots of the  $\text{Ni}_{0.61}\text{Co}_{0.39}\text{P}/\text{CC}$ ,  $\text{Ni}_{0.31}\text{Co}_{0.69}\text{P}/\text{CC}$ ,  $\text{Ni}_{0.22}\text{Co}_{0.78}\text{P}/\text{CC}$  and  $\text{NiCoP}/\text{CC}$  catalysts for UOR in 1 M KOH and 0.5 M urea.

Figure S6a shows the LSV polarization curves of all bimetallic phosphide electrodes with different Ni/Co ratios in 1.0 M KOH and 0.5 M urea. It is clearly noted that the UOR activity decreases with the decrease of the Co doping concentration. Specifically,  $\text{NiCoP}/\text{CC}$  electrode exhibited superior UOR activity with a lowest potential of 1.30 V at the current density of  $10 \text{ mA cm}^{-2}$ , which is much smaller than those of  $\text{Ni}_{0.22}\text{Co}_{0.78}\text{P}/\text{CC}$  (1.33 V),  $\text{Ni}_{0.31}\text{Co}_{0.69}\text{P}/\text{CC}$  (1.36 V) and  $\text{Ni}_{0.61}\text{Co}_{0.39}\text{P}/\text{CC}$  (1.38 V) electrodes. Meanwhile, the smaller Tafel slope of  $\text{NiCoP}/\text{CC}$  ( $49 \text{ mV dec}^{-1}$ )

indicates its faster UOR kinetics than other samples (Figure S6b).

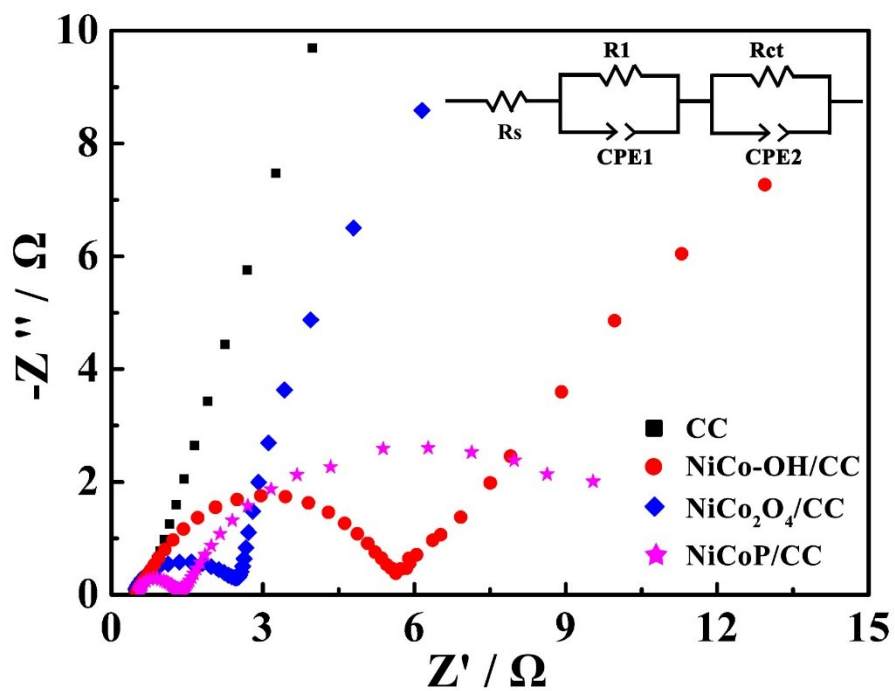

**Figure S7.** Nyquist plots of NiCoP/CC, NiCo<sub>2</sub>O<sub>4</sub>/CC, NiCo-OH/CC and bare CC catalysts for UOR process at 1.32 V vs. RHE.

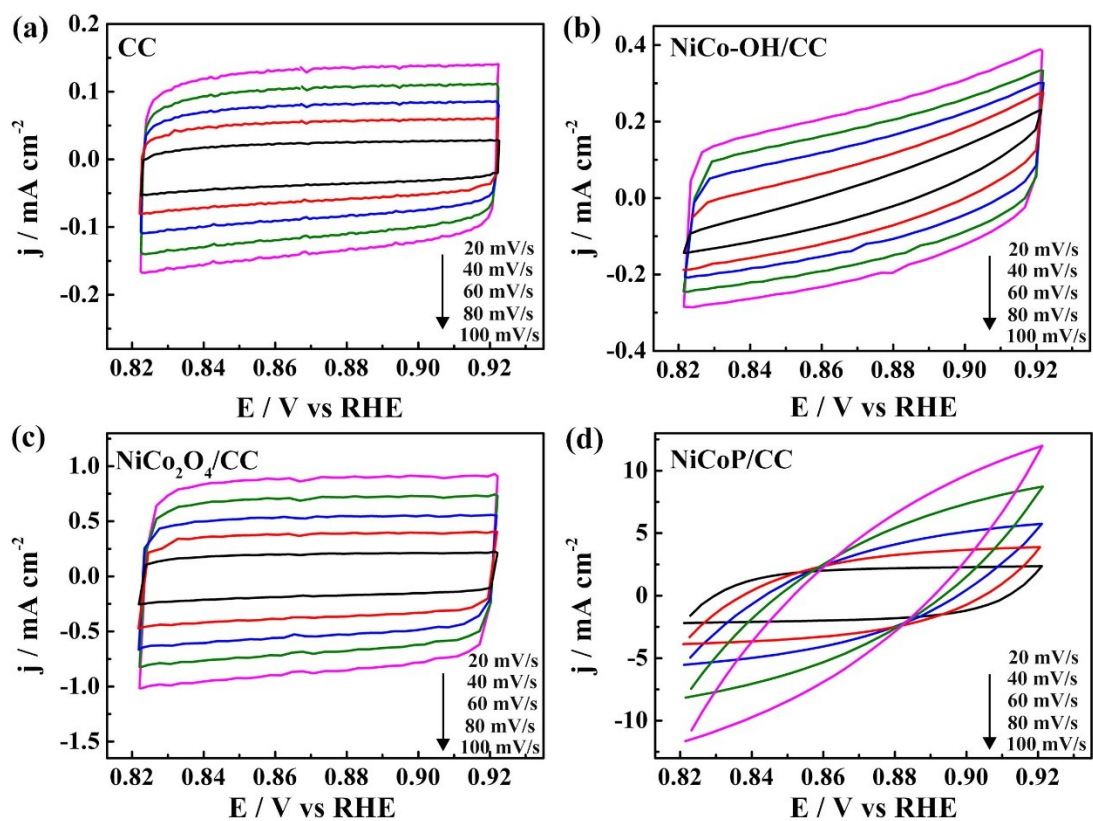

**Figure S8.** Cyclic voltammetry curves for (a) CC, (b) NiCo-OH/CC, (c) NiCo<sub>2</sub>O<sub>4</sub>/CC and (d) NiCoP/CC electrodes in the region of 0.82-0.92 V vs. RHE with different scanning rates upon UOR catalysis.

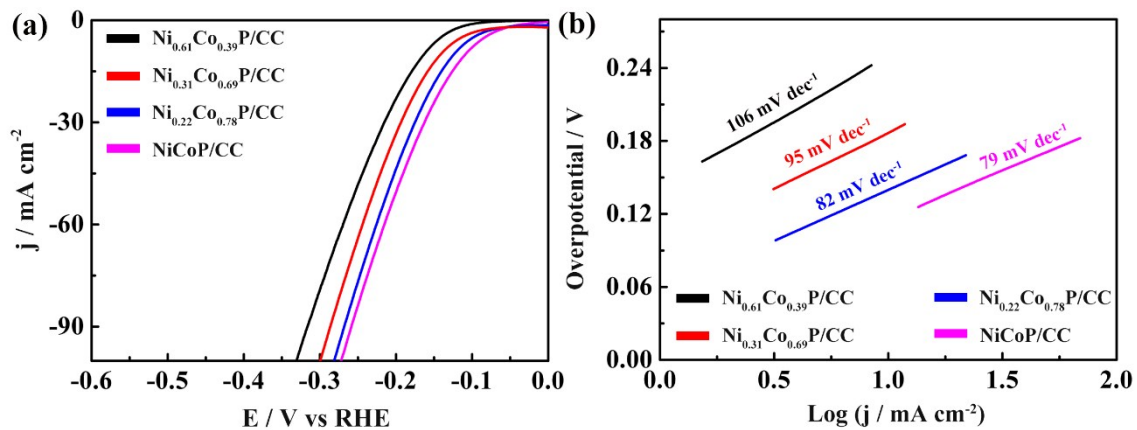

**Figure S9.** (a) LSV curves and (b) Tafel plots of the Ni<sub>0.61</sub>Co<sub>0.39</sub>P/CC, Ni<sub>0.31</sub>Co<sub>0.69</sub>P/CC, Ni<sub>0.22</sub>Co<sub>0.78</sub>P/CC and NiCoP/CC catalysts for HER in 1 M KOH solution.

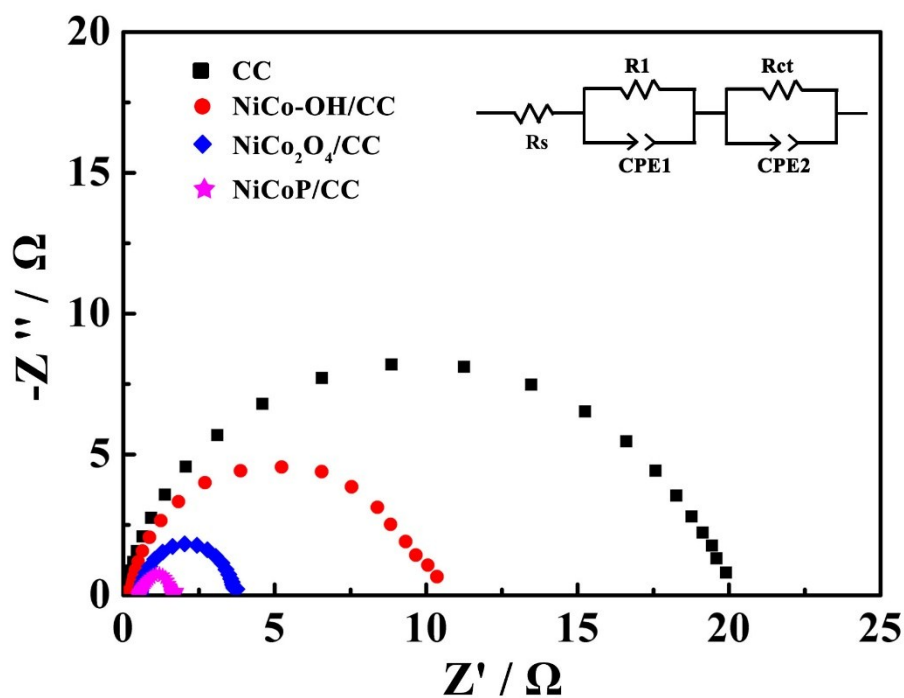

**Figure S10.** Nyquist plots of NiCoP/CC, NiCo<sub>2</sub>O<sub>4</sub>/CC, NiCo-OH/CC and bare CC catalysts at an overpotential of 300 mV toward HER.

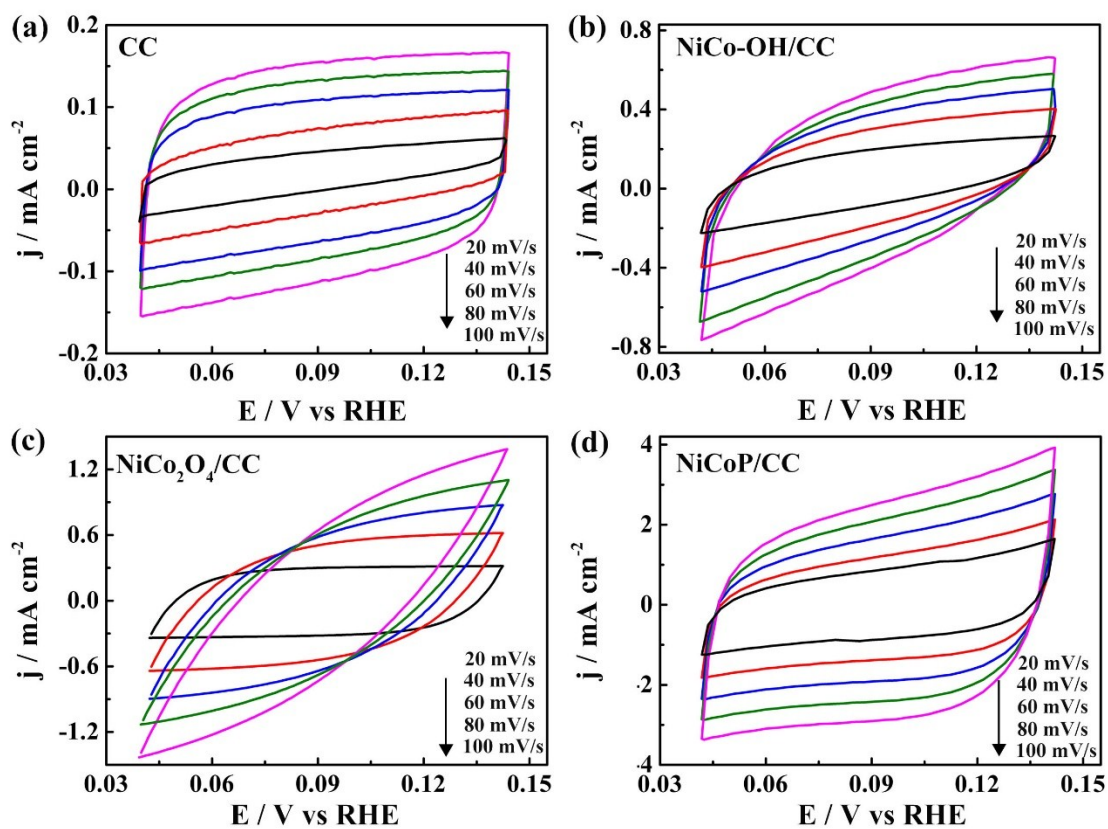

**Figure S11.** Cyclic voltammetry curves for (a) CC, (b) NiCo-OH/CC, (c) NiCo<sub>2</sub>O<sub>4</sub>/CC and (d) NiCoP/CC electrodes in the region of 0.04-0.14 V vs. RHE with different scanning rates upon HER catalysis.



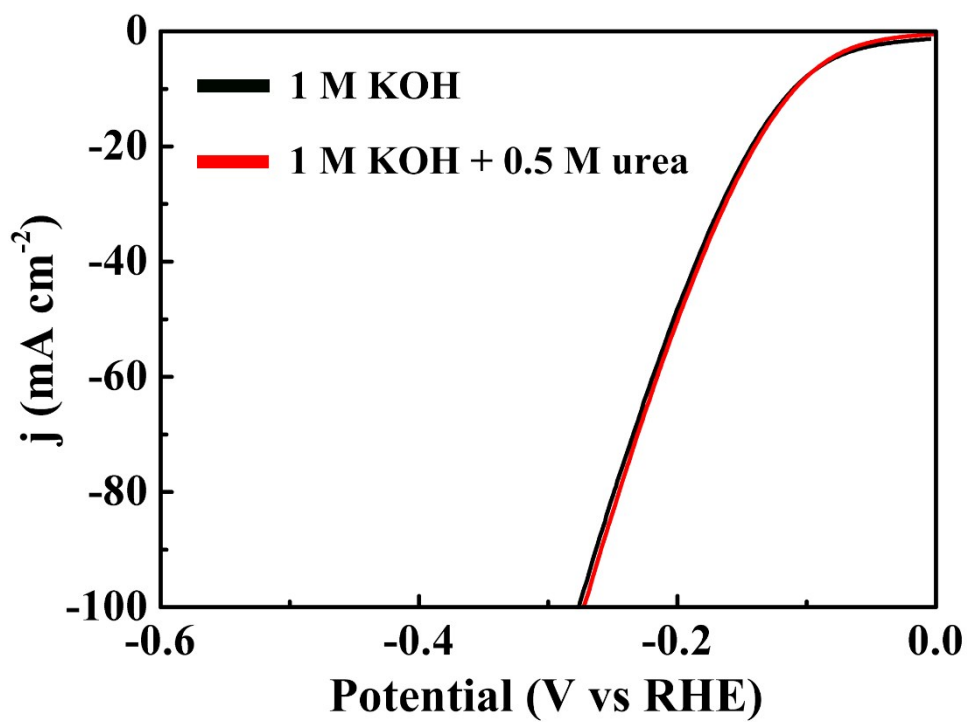

**Figure S12.** Polarization curves of NiCoP/CC in 1.0 M KOH with and without 0.5 M urea at a scan rate of  $2 \text{ mV s}^{-1}$  for HER.

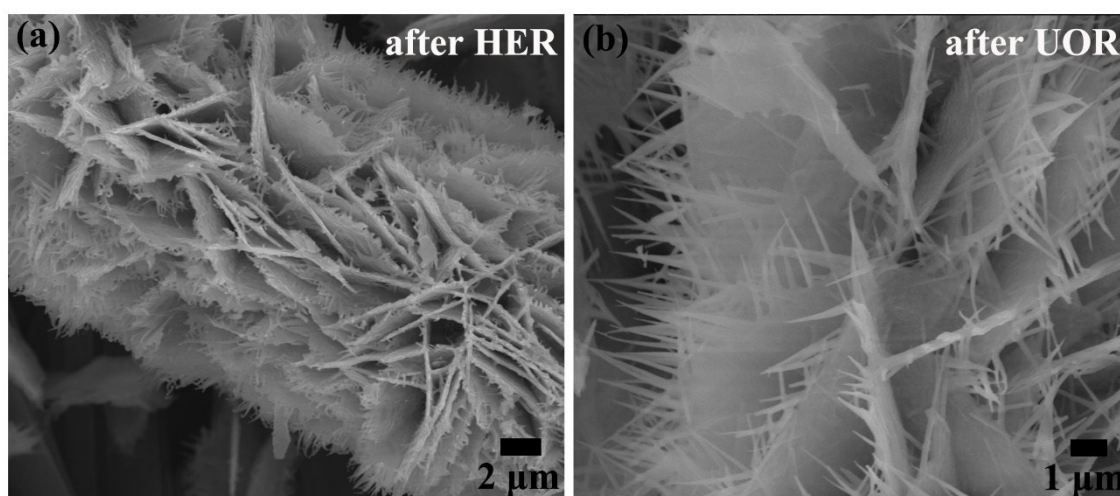

**Figure S13.** SEM images of NiCoP/CC after (a) HER and (b) UOR stability test.

**Table S1.** Comparison of the UOR performance of NiCoP/CC catalyst with other reported UOR catalysts.

| Catalysts                                               | Urea concentrate (M) | j (mA cm <sup>-2</sup> ) | Voltage (V vs RHE) | References       |
|---------------------------------------------------------|----------------------|--------------------------|--------------------|------------------|
| Ni(OH) <sub>2</sub>                                     | 0.33                 | 10                       | 1.42               | 1                |
| Fe <sub>11.1%</sub> -Ni <sub>3</sub> S <sub>2</sub> /Ni | 0.33                 | 10                       | 1.35               | 2                |
| NF/NiMoO                                                | 0.5                  | 10                       | 1.37               | 3                |
| Ni <sub>3</sub> N/CC                                    | 0.33                 | 10                       | 1.35               | 4                |
| Ni(OH) <sub>2</sub> -graphene                           | 0.33                 | 10                       | 1.43               | 5                |
| MnO <sub>2</sub> /MnCo <sub>2</sub> O <sub>4</sub> /Ni  | 0.5                  | 10                       | 1.33               | 6                |
| Ni <sub>2</sub> P/CFC                                   | 0.33                 | 10                       | 1.34               | 7                |
| NF/MnO <sub>2</sub>                                     | 0.5                  | 10                       | 1.33               | 8                |
| NiCo <sub>2</sub> S <sub>4</sub> /CC                    | 0.33                 | 10                       | 1.35               | 9                |
| Ni <sub>3</sub> Se <sub>4</sub>                         | 0.5                  | 10                       | 1.38               | 10               |
| <b>NiCoP/CC</b>                                         | <b>0.5</b>           | <b>10</b>                | <b>1.30</b>        | <b>This work</b> |

**Table S2.** Comparison of the HER performance of NiCoP/CC with other reported non-precious electrocatalysts in 1M KOH electrolyte.

| Catalysts                                            | j<br>(mA cm <sup>-2</sup> ) | $\eta_j$ (mV) | Tafel slope<br>(mV dec <sup>-1</sup> ) | References       |
|------------------------------------------------------|-----------------------------|---------------|----------------------------------------|------------------|
| NiFeS/Ni                                             | 10                          | 180           | 53                                     | 11               |
| MoP                                                  | 10                          | 52            | 40                                     | 12               |
| NiCo <sub>2</sub> S <sub>4</sub> /Ni                 | 10                          | 210           | 58.9                                   | 13               |
| FePo <sub>4</sub>                                    | 10                          | 123           | 104.5                                  | 14               |
| Ni(OH) <sub>2</sub> /Ni <sub>3</sub> S <sub>2</sub>  | 20                          | 211           | 129                                    | 15               |
| CC/CoP                                               | 10                          | 110           | 129                                    | 16               |
| Ni <sub>3</sub> S <sub>2</sub>                       | 10                          | 60.8          | 67.5                                   | 17               |
| NiMoP                                                | 10                          | 135           | 137.5                                  | 18               |
| Ni <sub>12</sub> P <sub>5</sub>                      | 10                          | 107           | 63                                     | 19               |
| MoS <sub>2</sub> -Ni <sub>3</sub> S <sub>2</sub> /NF | 10                          | 110           | 83                                     | 20               |
| NiSe/NF                                              | 10                          | 96            | 120                                    | 21               |
| <b>NiCoP/CC</b>                                      | <b>10</b>                   | <b>107</b>    | <b>79</b>                              | <b>This work</b> |

## References

- [1] X. Zhu, X. Dou, J. Dai, X. An, Y. Guo, L. Zhang, S. Tao, J. Zhao, W. Chu, X. C. Zeng, C. Wu and Y. Xie, *Angew. Chem. Int. Ed.*, 2016, **55**, 12465-12469.
- [2] W. X. Zhu, Z. H. Yue, W. T. Zhang, N. Hu, Z. T. Luo, M. R. Ren, Z. J. Xu, Z. Y. Wei, Y. R. Suo and J. L. Wang, *J. Mater. Chem. A*, 2018, **6**, 4346-4353.
- [3] Z. Y. Yu, C. C. Lang, M. R. Gao, Y. Chen, Q. Q. Fu, Y. Duan and S. H. Yu, *Energ. Environ. Sci.*, 2018, **11**, 1890-1897.
- [4] Q. Liu, L. S. Xie, F. L. Qu, Z. Liu, G. Du, M. A. Abdullah and X. P. Sun, *Inorg. Chem. Front.*, 2017, **4**, 1120-1124.
- [5] D. Wang, W. Yan, S. H. Vijapur and G. G. Botte, *Electrochem. Acta*, 2013, **89**, 732-736.
- [6] C. L. Xiao, S. N. Li, X. Y. Zhang and D. R. MacFarlane, *J. Mater. Chem. A*, 2017, **5**, 7825-7832.
- [7] X. Zhang, Y. Y. Liu, Q. Z. Xiong, G. Q. Liu, C. J. Zhao, G. Z. Wang, Y. X. Zhang, H. M. Zhang and H. J. Zhao, *Electrochim. Acta*, 2017, **254**, 44-49.
- [8] S. Chen, J. Duan, A. Vasileff and S. Z. Qiao, *Angew. Chem. Int. Ed.*, 2016, **55**, 3804-3808.
- [9] W. X. Zhu, M. R. Ren, N. Hu, W. T. Zhang, Z. T. Luo, R. Wang, J. Wang, L. J. Huang, Y. R. Suo and J. L. Wang, *ACS Sustainable Chem. Eng.*, 2018, **6**, 5011-5020.
- [10] J. Y. Zhang, X. N. Tian, T. He, S. Zaman, M. Miao, Y. Yan, K. Qi, Z. H. Dong, H. F. Liu and B. Xia, *J. Mater. Chem. A*, 2018, **6**, 15653-15658.
- [11] P. Ganesan, A. Sivanantham and S. Shanmugam, *J. Mater. Chem. A*, 2016, **4**, 16394-16402.

- [12] X. Zhang, F. Zhou, W. Y. Pan, Y. Y. Liang, and R. H. Wang, *Adv. Funct. Mater.*, **28**, 1804600.
- [13] A. Sivanantham, P. Ganesan and S. Shanmugam, *Adv. Funct. Mater.*, 2016, **26**, 4661-4672.
- [14] L. Yang, Z. L. Guo, J. Huang, Y. N. Xi, R. J. Gao, G. Su, W. Wang, L. X. Cao, and B. H. Dong, *Adv. Mater.*, 2017, **29**, 1704574.
- [15] X. Q. Du, Z. Yang, Y. Li, Y. Q. Gong and M. Zhao, *J. Mater. Chem. A*, 2018, **6**, 6938-6946.
- [16] J. Tian, Q. Liu, A. M. Asiri and X. Sun, *J. Am. Chem. Soc.*, 2014, **136**, 7587-7590.
- [17] C. Yang, M. Y. Gao, Q. B. Zhang, J. R. Zeng, X. T. Li and A. P. Abbott, *Nano Energy*, 2017, **36**, 85-94.
- [18] H. Xu, J. J. Wei, K. Zhang, Y. Shiraishi, and Y. K. Du, *ACS Appl. Mater. Interfaces*, 2018, **10**, 29647-29655.
- [19] Z. P. Huang, Z. B. Chen, Z. Z. Chen, C. C. Lv, H. Meng, and C. Zhang, *ACS Nano*, 2014, **8**, 8121-8129.
- [20] J. Zhang, T. Wang, D. Pohl, B. Rellinghaus, R. Dong, S. Liu, X. Zhuang and X. Feng, *Angew. Chem. Int. Ed.*, 2016, **55**, 6702-6707.
- [21] C. Tang, N. Y. Cheng, Z. H. Pu, W. Xing, and X. P. Sun, *Angew. Chem. Int. Ed.*, 2015, **54**, 9351-9355.
